# Supplementary material for: π-Stacked Polymer Consisting of a Pseudo–meta–[2.2]Paracyclophane Skeleton
Source: MDPI journal article supplement (doi:10.3390/polym10101140), 2018-10-12
Supplement: s1 [file s1]

# Supplementary Materials: $\pi$ -Stacked Polymer Consisting of a Pseudo-*meta*-[2.2]Paracyclophane Skeleton

Hazuki Maeda, Mayu Kameda, Takuji Hatakeyama and Yasuhiro Morisaki

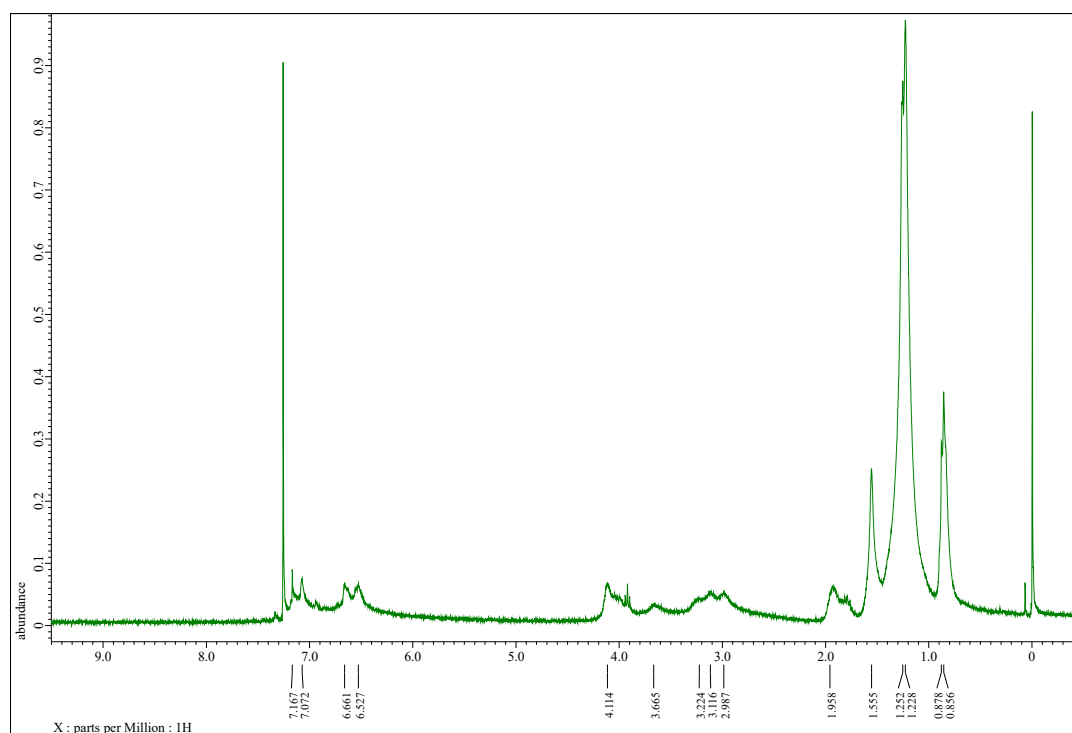

Figure S1.  $^1\text{H}$  NMR spectrum of *m*-P1.

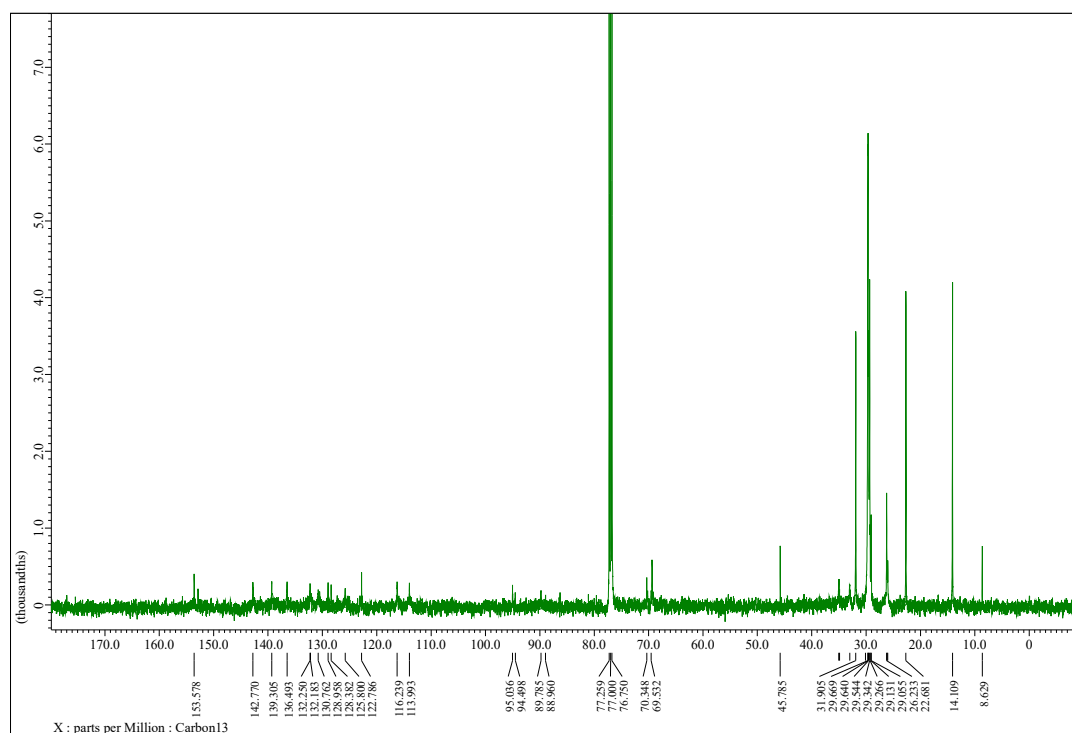Figure S2.  $^{13}\text{C}$  NMR spectrum of *m*-P1.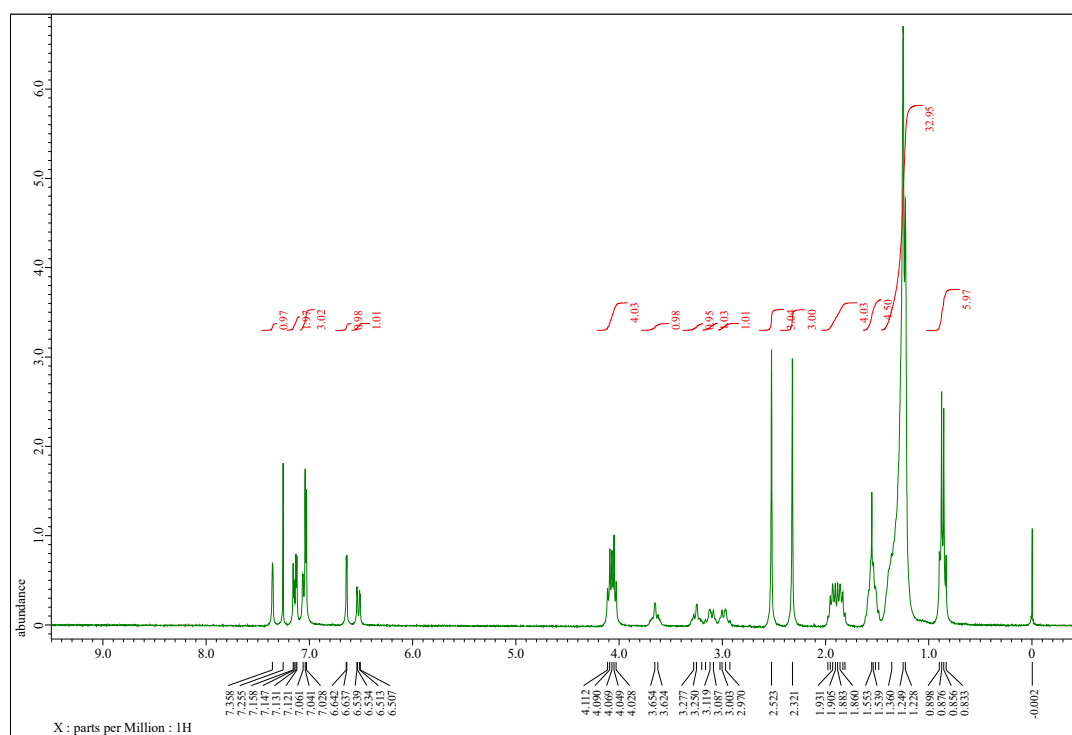Figure S3.  $^1\text{H}$  NMR spectrum of *m*-D1.

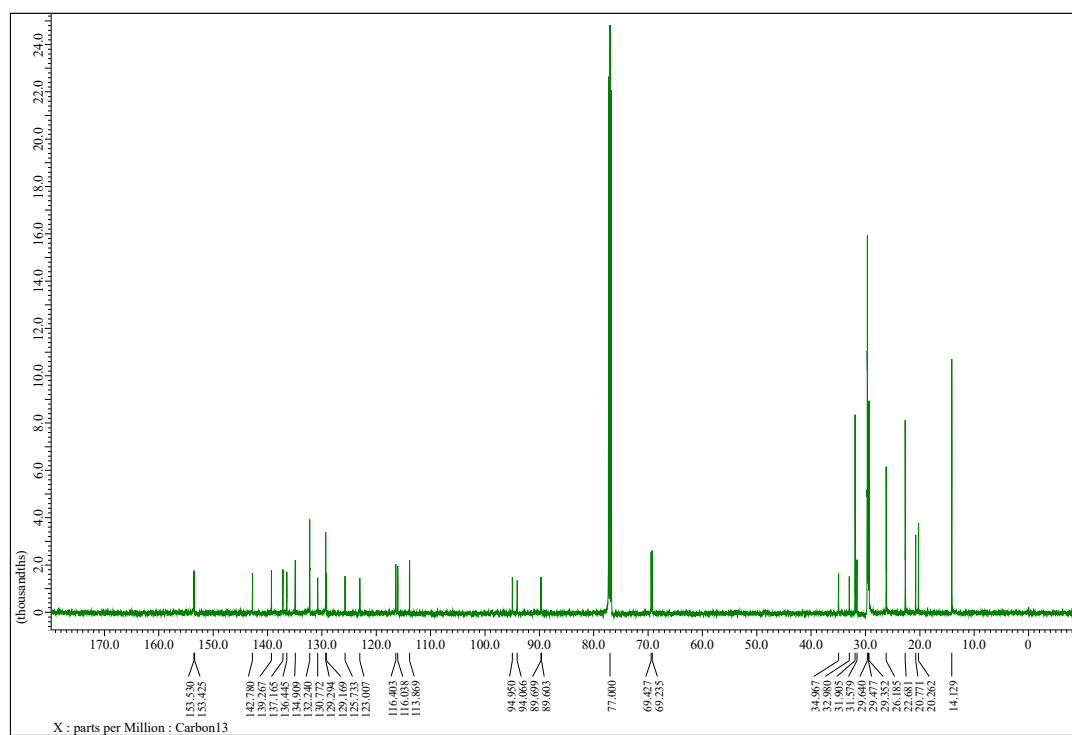

Figure S4. <sup>13</sup>C NMR spectrum of *m*-D1.

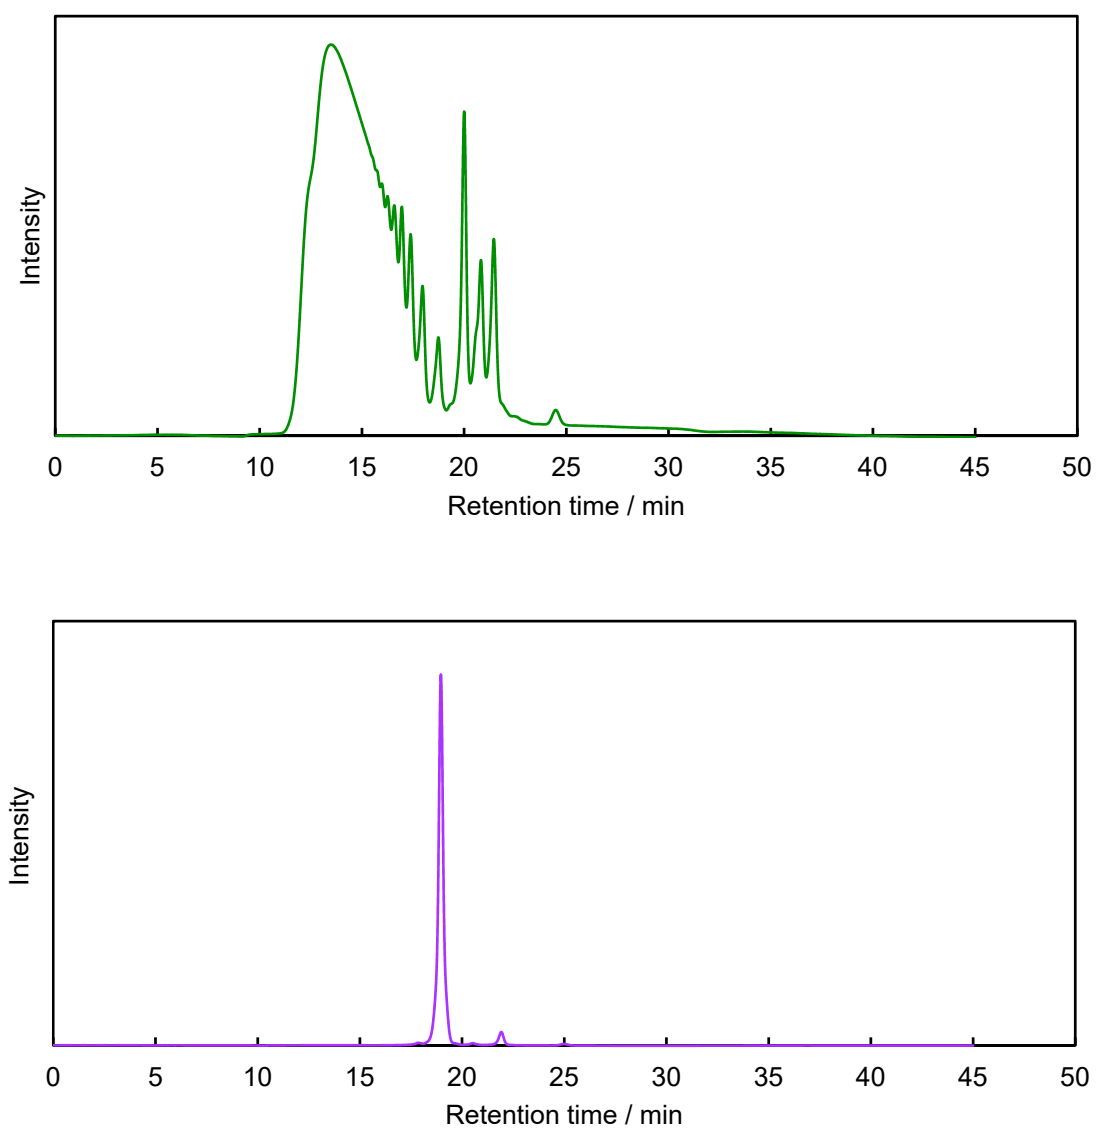

Figure S5. GPC curves of *m*-P1 after the polymerization (upper) and *m*-D1 (lower).

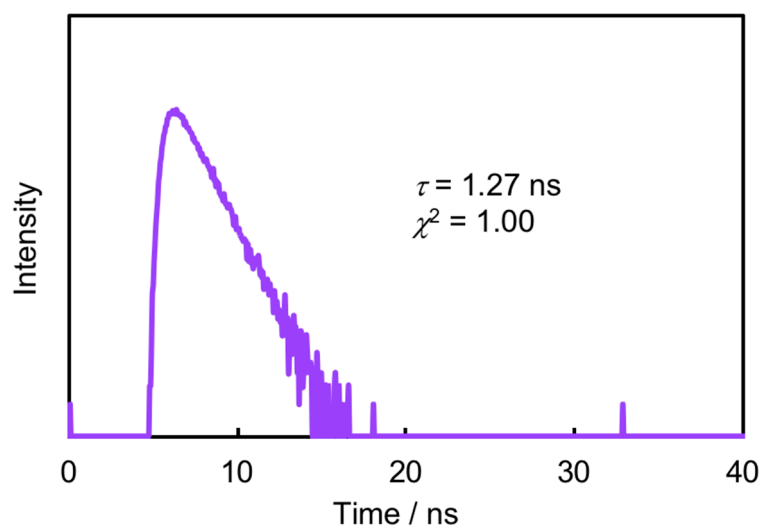

Figure S6. PL decay curve of *m*-D1 at  $\lambda_{\text{PL,max}}$  in  $\text{CHCl}_3$  ( $1.0 \times 10^{-5} \text{ M}$ ).

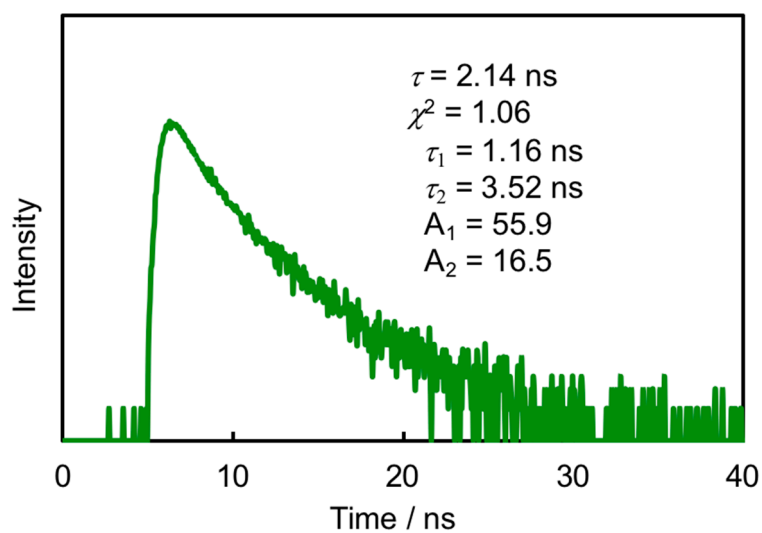

Figure S7. PL decay curve of *m*-P1 at 575 nm in CHCl<sub>3</sub> ( $1.0 \times 10^{-5}$  M).

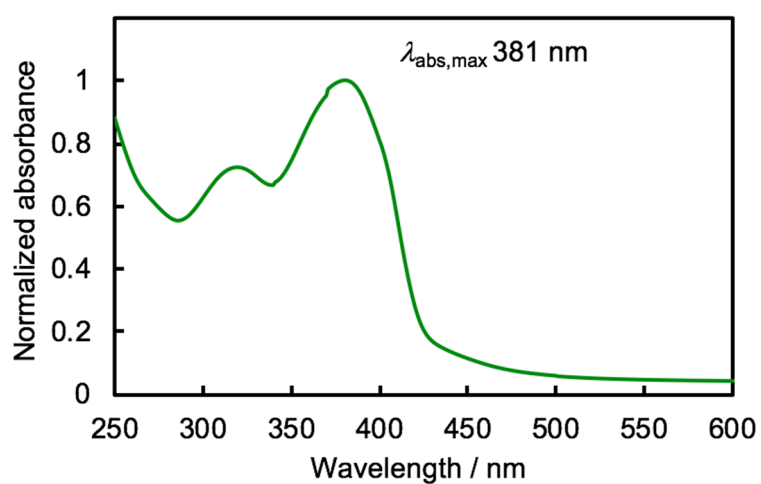

Figure S8. UV-vis absorption spectrum of *m*-P1 film.

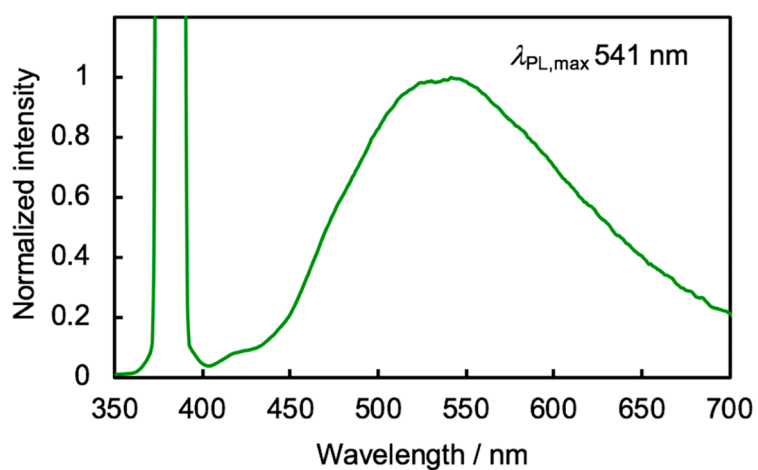

Figure S9. PL spectrum of *m*-P1 film excited at 381 nm.

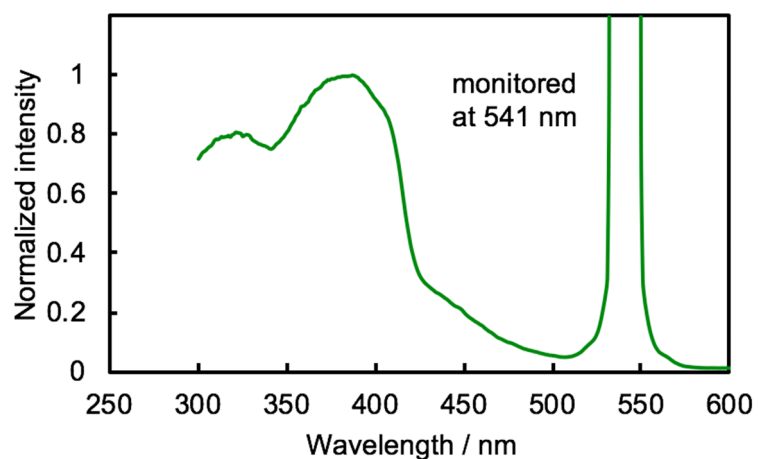

Figure S10. Excitation spectrum of *m*-P1 film monitored at 541 nm.

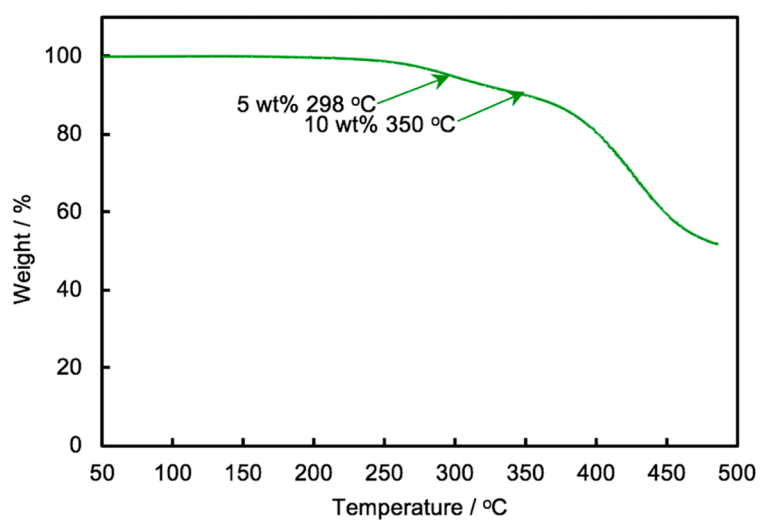

Figure S11. TGA thermogram of *m*-P1 at heating rate of 10 °C/min under N<sub>2</sub>.

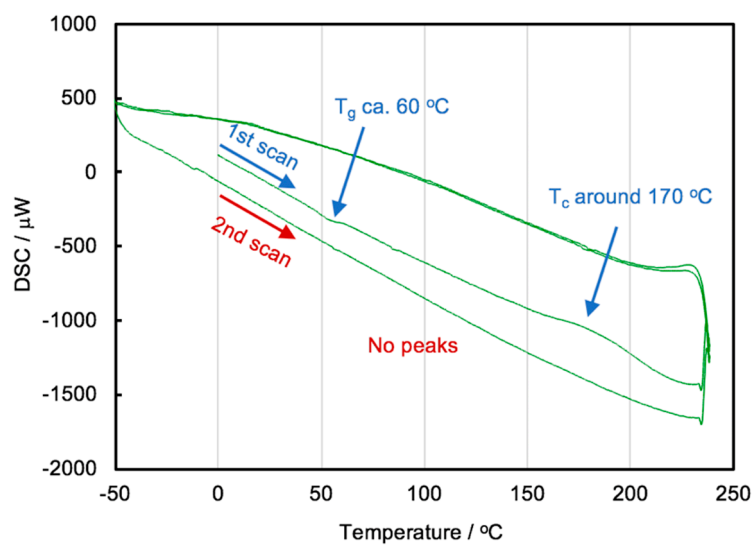

Figure S12. DSC thermograms of *m*-P1 at heating and cooling rate of 10 °C/min under N<sub>2</sub>.
